# Built on sand: the shaky foundations of simulating single-cell RNA sequencing data

Helena L. Crowell<sup>1,2</sup>, Sarah X. Morillo Leonardo<sup>3</sup>, Charlotte Sonesson<sup>1,2,4</sup> & Mark D. Robinson<sup>1,2</sup>

<sup>1</sup>*Department of Molecular Life Sciences, University of Zurich, Zurich, Switzerland*

<sup>2</sup>*SIB Swiss Institute of Bioinformatics, University of Zurich, Switzerland*

<sup>3</sup>*ETH Zurich, Zurich, Switzerland*

<sup>4</sup>*Current address: Friedrich Miescher Institute for Biomedical Research and SIB Swiss Institute of Bioinformatics, Basel, Switzerland*

## Abstract

With the emergence of hundreds of single-cell RNA-sequencing (scRNA-seq) datasets, the number of computational tools to analyse aspects of the generated data has grown rapidly. As a result, there is a recurring need to demonstrate whether newly developed methods are truly performant – on their own as well as in comparison to existing tools. Benchmark studies aim to consolidate the space of available methods for a given task, and often use simulated data that provide a ground truth for evaluations. Thus, demanding a high quality standard for synthetically generated data is critical to make simulation study results credible and transferable to real data.

Here, we evaluated methods for synthetic scRNA-seq data generation in their ability to mimic experimental data. Besides comparing gene- and cell-level quality control summaries in both one- and two-dimensional settings, we further quantified these at the batch- and cluster-level. Secondly, we investigate the effect of simulators on clustering and batch correction method comparisons, and, thirdly, which and to what extent quality control summaries can capture reference-simulation similarity.

Our results suggest that most simulators are unable to accommodate complex designs without introducing artificial effects; they yield over-optimistic performance of integration, and potentially unreliable ranking of clustering methods; and, it is generally unknown which summaries are important to ensure effective simulation-based method comparisons.

## Introduction

Single-cell RNA-sequencing (scRNA-seq) has become an established tool for studying the transcriptome at individual cell resolution. Since the first scRNA-seq study's publication in 2009<sup>[1]</sup>, there has been a rapid increase in the number of scRNA-seq datasets, number of cells and samples per dataset<sup>[2]</sup>, and a corresponding growth in the number of computational methods to analyse such data, with over one thousand tools catalogued to date<sup>[3,4]</sup>. With the development of new methods comes the need to demonstrate their performance, and to consolidate the space of available methods through comprehensive and neutral benchmark studies<sup>[5,6,7]</sup>.

In this context, simulations have become an indispensable tool, for example, to investigate how methods respond to varying parameter inputs and quantify their scalability in terms of computational cost, as well as ensuring that a method is performant across a range of scenarios and in comparison to other available tools. The attractiveness of simulation studies is largely due to being able to specify a ground truth, which is often challenging or infeasible to establish in experimental data<sup>[8]</sup>. For example, evaluation of methods to group cells into biologically meaningful subpopulations (clusters) relies on 'true' labels to be compared against. While these may be attainable (e.g., through cell-sorting) or derived (e.g., manual annotation by an expert), simulations enable testing methods across a wide range of scenarios where the number of clusters, between-cluster (dis)similarity and effects of other covariates can be deeply explored. As a result, simulations have been applied to benchmark methods across a wide range of tasks, including differential expression analysis<sup>[9,10,11]</sup>, trajectory inference<sup>[12]</sup>, and data integration<sup>[13,14]</sup>.

By definition, simulations generate *synthetic* data. On the one hand, conclusions drawn from simulation studies are frequently criticized, because simulations cannot completely mimic (real) experimental data. On the other hand, it is often too expensive, or even impossible, to generate experimental data that is suitable for formal performance comparison. Nonetheless, setting a high quality standard for simulations is all the more important to ensure results based on them are transferable to corresponding experimental datasets.

Typically, new simulation methods come with minimal (non-neutral) benchmarks that focus on one-dimensional evaluations, i.e. how similarly a set of summaries is distributed between a reference and simulated dataset (e.g., Zappia *et al.*<sup>[15]</sup>). In some cases, two-dimensional relationships (e.g., gene expression mean-variance) are explored (e.g., Assefa *et al.*<sup>[16]</sup>). However, the faithfulness of the full complexity of the simulated scRNA-seq data, including batch effects and clusters, is rarely evaluated. To date, there has been only one neutral evaluation of how well scRNA-seq data simulators recapitulate key characteristics of the counts, sample- and subpopulation-effects present in real data<sup>[17]</sup>; in particular, they proposed a novel kernel density metric to evaluate similarity of real and simulated data summaries. However, to what extent simulators affect the results of method comparisons is not considered.

Methods for simulating scRNA-seq data may be categorized according to various factors. Most importantly, there is a dichotomy between methods that generate synthetic data *de novo*, and those that rely on a reference dataset. The former depend on user-defined parameter inputs to generate counts, and introduce artificial effects between, e.g., different groups of cells or samples. Conversely, reference-based methods estimate parameters to mimic the gene expression profiles observed in the reference dataset. However, many methods employ a hybrid framework where, e.g., baseline parameters are estimated from a 'singular' reference (i.e., a homogeneous group of cells), and additional layers of complexity (e.g., batch effects, multiple clusters and/or experimental conditions) are added *post hoc*. Both strategies have their advantages and disadvantages: *de novo* simulators offer high flexibility in varying the strength and specificity of different effects, but might not generate realistic data; in contrast, reference-based methods are limited to the complexity of the input data and consequently less flexible, but are by default more realistic. Taken together, there is a trade-off between how applicable methods are in benchmarking single-cell analysis tools across a wide range of scenarios versus whether simulation study results are directly transferable to real data.

Here, we evaluated 16 scRNA-seq simulation methods in their ability to replicate important aspects of a real reference dataset. We considered various global, gene- and cell-level summaries, and compared them between reference and simulated data, in both one- and two-dimensional settings. In addition to global distributions (i.e. across all cells), we made batch- and cluster-level comparisons to capture structural differences in the summaries.

Our results suggest that there is a noticeable shortage of simulators that can accommodate complex situations, and that popular simulators do not adequately mimic real datasets. In particular, some current methods are able to simulate multiple groups of cells (e.g., batches and/or clusters), but do so in an *ad hoc* manner, e.g., by introducing arbitrary differences based on parameter inputs. Few methods attempt to estimate and mimic group effects from reference datasets, but this comes at a loss of supplying a ground truth.

## Results

**Benchmark design.** We evaluated simulators based on 12 published datasets (see [Reference datasets](#)), from which we generated a variety of subsets that serve as references for simulation ([Supp. Tab. 1](#)). We labelled references as one of three types according to their complexity: type *n* are ‘singular’ references that contain cells from a single batch and cluster; type *b* contain cells from multiple batches; and type *k* contain cells from multiple clusters ([Supp. Fig. 1-3](#)). Here, batches can be either biological or technical replicates; clusters refer to cell subpopulations or types as annotated in the original data; and groups can be either batches, clusters, or experimental conditions. In total, we used 10, 8, and 8 references of type *n*, *b*, and *k*, respectively.

To objectively cover the space of currently available simulators, we browsed the scRNA-seq tools database<sup>[3,4]</sup>, which, at the time of writing, catalogued over 1000 tools for analysing scRNA-seq data, 65 of which hold a “simulation” tag. We included all methods that i) could be installed and run after at most minor manual adjustment(s); and, ii) were reference-based, i.e., supported parameter estimation from a real dataset. We selected a total of 16 methods, 10/8 of which could accommodate batches/clusters ([Tab. 1](#)). A brief summary of each method’s model framework, capabilities and limitations, as well as the parameter settings used in this study is given under [Methods](#).

Because different simulators can generate different levels of complexity (two groups, multiple clusters or batches, both or neither), we tagged each method according to their capabilities (type *n*, *b* and/or *k*). Each method was only run on corresponding reference datasets. A more detailed overview of the computational pipeline for this study is given in [Fig. 1](#) (see also [Computational workflow](#)).

In order to investigate how widely and for what purpose different simulators are applied, we browsed the literature for benchmark studies that compare tools for a specific scRNA-seq analysis task. Depending on the task, such comparisons often rely on simulation studies where a ground truth is known (by design), or a combination of simulated and real data, where an experimental ground truth exists. For each benchmark, we summarized the task of interest and, if any, which simulator(s) are used. Across all considered benchmarks, these amounted to only five, namely: *muscat* (1), *scDesign* (1), *powsimR* (2), *scDD* (3), and *splatter* (13). Benchmark tasks included batch effects<sup>[13,14]</sup>, clustering<sup>[18,19,20]</sup>, doublet detection<sup>[21]</sup>, differential expression<sup>[9,10,11,22]</sup>, dimensionality reduction<sup>[23,24]</sup>, imputation<sup>[25,26]</sup>, isoform quantification<sup>[27]</sup>, marker selection<sup>[28,29]</sup>, normalization<sup>[30]</sup>, pipelines<sup>[31,32]</sup>, cell type assignment<sup>[33]</sup>, and trajectory inference<sup>[12]</sup>.

|                               | Batches | Clusters | Type(s)             | Parallelization | Availability | Year | Model                                                                                  | Benchmark(s)                                  |
|-------------------------------|---------|----------|---------------------|-----------------|--------------|------|----------------------------------------------------------------------------------------|-----------------------------------------------|
| BASiCS <sup>[34]</sup>        | ✓       | ✗        | b                   | ✓ ✗             | R/Bioc       | 2015 | NB                                                                                     |                                               |
| ESCO <sup>[35]</sup>          | ✓       | ✓        | n,b,k               | ✓ ✓             | R/GitHub     | 2020 | Gamma-Poisson                                                                          |                                               |
| hierarchicell <sup>[36]</sup> | ✓       | ✗        | n,b                 | ✗ ✗             | R/GitHub     | 2021 | NB                                                                                     |                                               |
| muscat <sup>[37]</sup>        | ✓       | ✓        | n,b,k               | ✗ ✗             | R/Bioc       | 2020 | NB                                                                                     | [32]                                          |
| POWSC <sup>[38]</sup>         | ✗       | ✓        | n,k                 | ✗ ✗             | R/Bioc       | 2020 | zero-inflated, log-normal Poisson mixture                                              |                                               |
| powsimR <sup>[39]</sup>       | ✗       | (✓)      | n*(,k)              | ✓ ✓             | R/GitHub     | 2017 | NB                                                                                     | [10,31]                                       |
| scDD <sup>[40]</sup>          | ✗       | ✗        | n*                  | ✓ ✓             | R/Bioc       | 2016 | Bayesian NB mixture model                                                              | [9,11,29]                                     |
| scDesign <sup>[41]</sup>      | ✗       | (✓)      | n(,k)               | ○ ✓             | R/GitHub     | 2019 | Gamma-Normal mixture model                                                             | [21]                                          |
| scDesign2 <sup>[42]</sup>     | ✗       | ✓        | n,k                 | ✓ ✗             | R/GitHub     | 2020 | (zero-inflated) Poisson or NB + Gaussian copula for gene-gene correlations             |                                               |
| SCRIP                         | ✓       | ✓        | n,b,k               | ✗ ✗             | R/GitHub     | 2020 | (zero-inflated) Poisson or NB + Gaussian copula for gene-gene correlations             |                                               |
| SPARSim <sup>[43]</sup>       | ✓       | ✗        | n,b                 | ✗ ✗             | R/GitLab     | 2020 | Gamma-multivariate hypergeometric                                                      |                                               |
| splatter <sup>[15]</sup>      | (✓)     | (✓)      | n(b,k) <sup>†</sup> | ✗ ✗             | R/Bioc       | 2017 | Gamma-Poisson                                                                          | [13,14,18,19,22,23,24]<br>[25,26,28,30,33,12] |
| SPsimSeq <sup>[16]</sup>      | ✓       | ✗        | n,b                 | ○ ✗             | R/Bioc       | 2020 | log-linear model-based density estimation + Gaussian copula for gene-gene correlations |                                               |
| SymSim <sup>[44]</sup>        | ✓       | ✗        | n,b                 | ✗ ✗             | R/GitHub     | 2019 | kinetic model using MCMC                                                               |                                               |
| ZINB-WaVE <sup>[45]</sup>     | ✓       | ✓        | n,b,k               | ✗ ✗             | R/Bioc       | 2018 | zero-inflated NB                                                                       |                                               |
| zingeR <sup>[46]</sup>        | ✗       | ✗        | n                   | ✗ ✗             | R/GitHub     | 2017 | zero-inflated NB                                                                       |                                               |

**Table 1:** Overview of scRNA-seq simulators compared in this study. Methods are ordered alphabetically and annotated according to their (in)ability to accommodate multiple batches and/or clusters, support for parallelization (parameter estimation and data simulation, respectively), software availability, and publication year. The right-most column catalogues neutral benchmark studies where each simulator was used. (✓ = yes, ✗ = no, (✓) = yes, but based on user input parameters, i.e. no support for parameter estimation, \*requires random splitting of cells into two groups, †type  $b/k$  accommodated by joining type  $n$  simulations of each group (batch/cluster), ○ = no separate estimation step).

In order to summarize how well each simulator recapitulates key characteristics of the reference scRNA-seq dataset, we computed a range of gene- and cell-level summaries for both reference and simulated datasets. These include average and variance of log-transformed counts per million (CPM), coefficient of variation, gene detection frequency, gene-to-gene correlation, log-transformed library size (total counts), cell detection frequency, cell-to-cell correlation, local density factor, cell-to-cell distance, and k-nearest neighbor (KNN) occurrences (see [Quality control summaries](#)).

Since some summaries (e.g., detection frequency) can vary between batches (e.g., sequencing depths may vary between protocols) and clusters (e.g., different cell types may differ in their overall expression), we computed them globally, i.e. across all cells, as well as for each batch and cluster. Thus, for a given dataset with  $B$  batches and  $K$  clusters, we obtain  $1$ ,  $1 + B$ , and  $1 + K$  results per summary for type  $n$ ,  $b$ , and  $k$ , respectively. Two additional summaries were computed across all cells – namely, the percent variance explained (PVE) at the gene-level (i.e. expression variance accounted for by batch/cluster for type  $b/k$ ); and the silhouette width and cell-specific mixing score (CMS) at the cell-level (considering as group labels the batch/cluster for type  $b/k$ ) – that aim to capture global batch or cluster effects on gene expression variability

100 and cell-to-cell similarity, respectively.

To evaluate simulator performance, we compared summaries between reference and simulated data in one- and two-dimensional settings by computing the Kolmogorov-Smirnov (KS) distance<sup>[47]</sup> and Wasserstein metric for each summary (Supp. Fig. 5-7), and the KS distance and earth mover's distance (EMD) for each relevant pair of summaries (Supp. Fig. 8-10). In general, these metrics quantify how dissimilar a pair of  
 105 (univariate or bivariate) distributions are (see Evaluation statistics). Test statistics were generally consistent between KS test and Wasserstein metric, as well as KS test and EMD (Supp. Fig. 4). Thus for brevity, method performances are hereafter reported as one- and two-dimensional KS statistics.

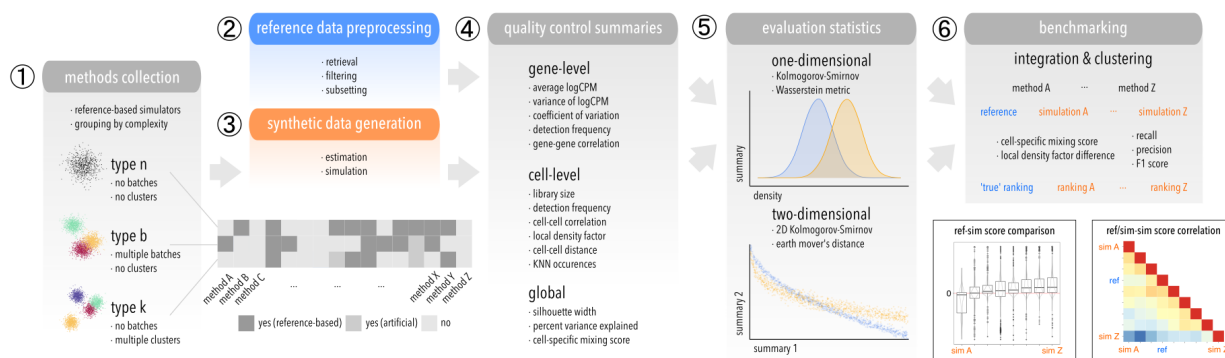

**Figure 1:** Schematic of the computational workflow used to benchmark scRNA-seq simulators. (1) Methods are grouped according to which level of complexity they can accommodate: type  $n$  ('singular'),  $b$  (batches),  $k$  (clusters). (2) Raw datasets are retrieved reproducibly from a public source, filtered, and subsetting into various datasets that serve as reference for (3) parameter estimation and simulation. (4) Various gene-, cell-level and global summaries are computed from reference and simulated data, and (5) compared in a one- and two-dimensional setting using two statistics each. (6) Integration and clustering methods are applied to type  $b$  and  $k$  references and simulations, respectively, and relative performances compared between reference-simulation and simulation-simulation pairs.

**Simulators vary in their ability to mimic scRNA-seq data characteristics.** Across all simulation types, cell-level quality control summaries were generally poorly recapitulated (Fig. 2a), with the largest  
 110 deviance in cell-to-cell correlation. The silhouette width, CMS and PVE gave amongst the highest KS distances for most methods, indicating that, while group-level (i.e., within a batch or cluster) summaries might be preserved well during simulation, the global data structure (e.g., inter-group relations) is not. Despite its popularity, splatter ranked in the middle for the majority of summaries, with a noticeably weak performance in cell-to-cell distance and silhouette width. scDD ranked poorly for most summaries, preceded  
 115 by hierarchicell and ESCO. Considering all summaries, ZINB-WaVE, scDesign2, and muscat were among the best performing simulators, yielding low KS test statistics across a large number of metrics and datasets (Fig. 2b).

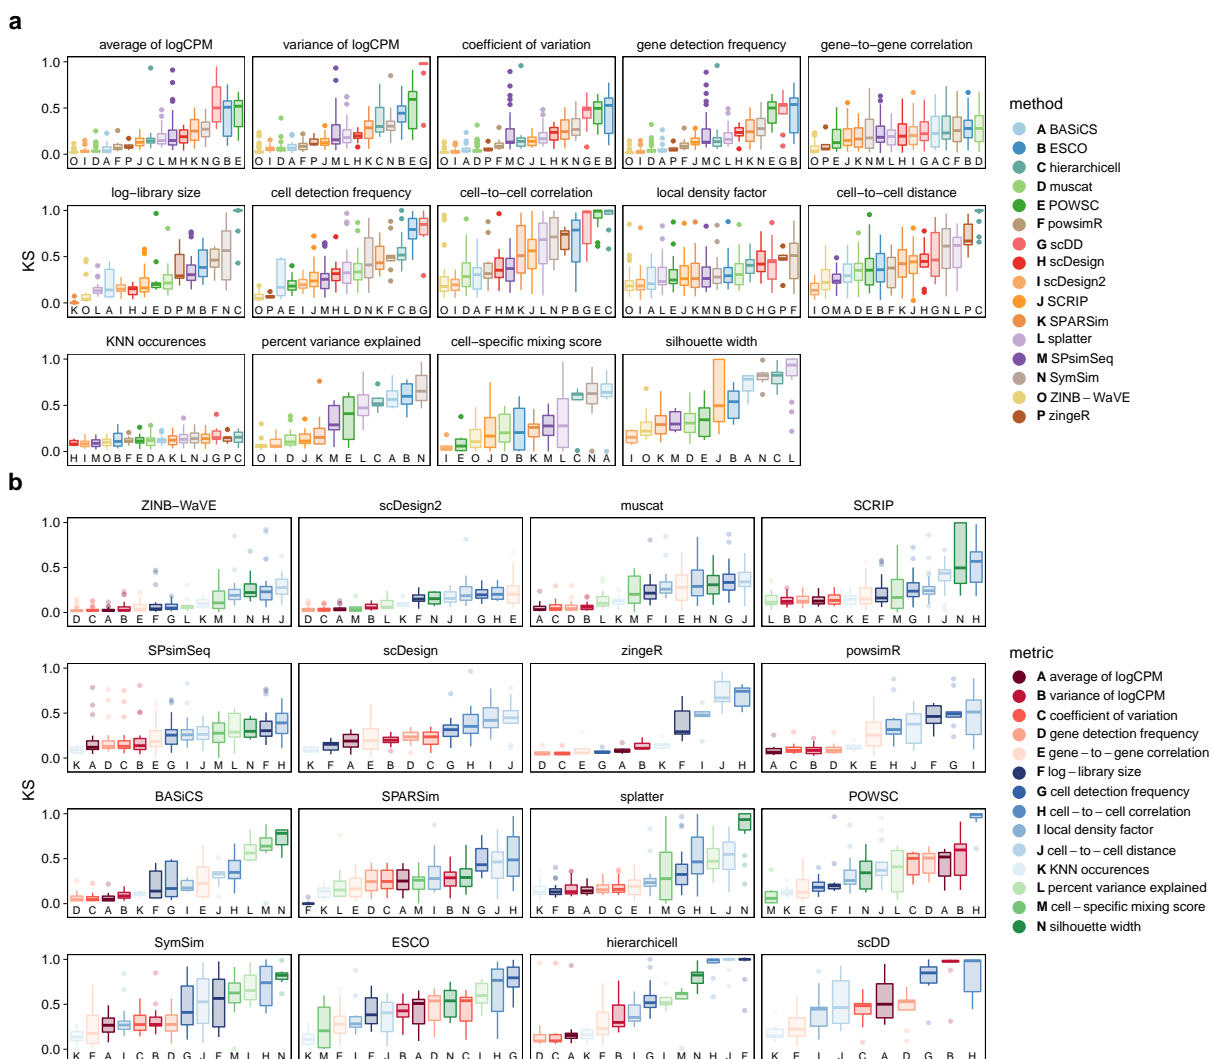

**Figure 2: Kolmogorov-Smirnov (KS) test statistics comparing reference and simulated data across methods and summaries.** Included are datasets and methods of all types; statistics are from global comparisons for type  $n$ , and otherwise averaged across cluster-/batch-level results. (a) Data are colored by method, and stratified by summary. For each summary (panel), methods (x-axis) are ordered according to their average. (b) Data are colored by summary, and stratified by method. For each method (panel), metrics (x-axis) are ordered according to their average from best (small) to worst (large KS statistic). Panels (methods) are ordered by increasing average across all summaries.

Finally, we ranked simulators according to their overall performance. In order to weight datasets equally and independently of the number of subsets drawn from them, we first averaged statistics across subsets, then datasets. Secondly, because simulators ranked similarly in both one- and two-dimensional comparisons, and performances were often linked for certain metrics, we limited rankings to one-dimensional evaluations only, and averaged across all gene- and cell-level metrics. This resulted in three independent rankings, one for each set of methods that can accommodate a given simulation type (Fig. 3). Notably, subpopulations (batches/clusters) may vary in size and complexity. Thus, for types other than  $n$ , we averaged across group-level results (instead of using global test results).

For type  $n$ , ZINB-WaVE, scDesign2, muscat, and SPsimSeq performed similarly well, with POWSC, ESCO, hierarchicell, and scDD ranking last across various summaries. ZINB-WaVE and muscat were also the most performant among type  $b$  and  $k$  simulators, joined by SPARSim and scDesign2, respectively. LDF,

cell-to-cell distance and correlation (across all types) and global summaries (PVE and silhouette width for type  $b$  and  $k$ ) were poorly recapitulated.

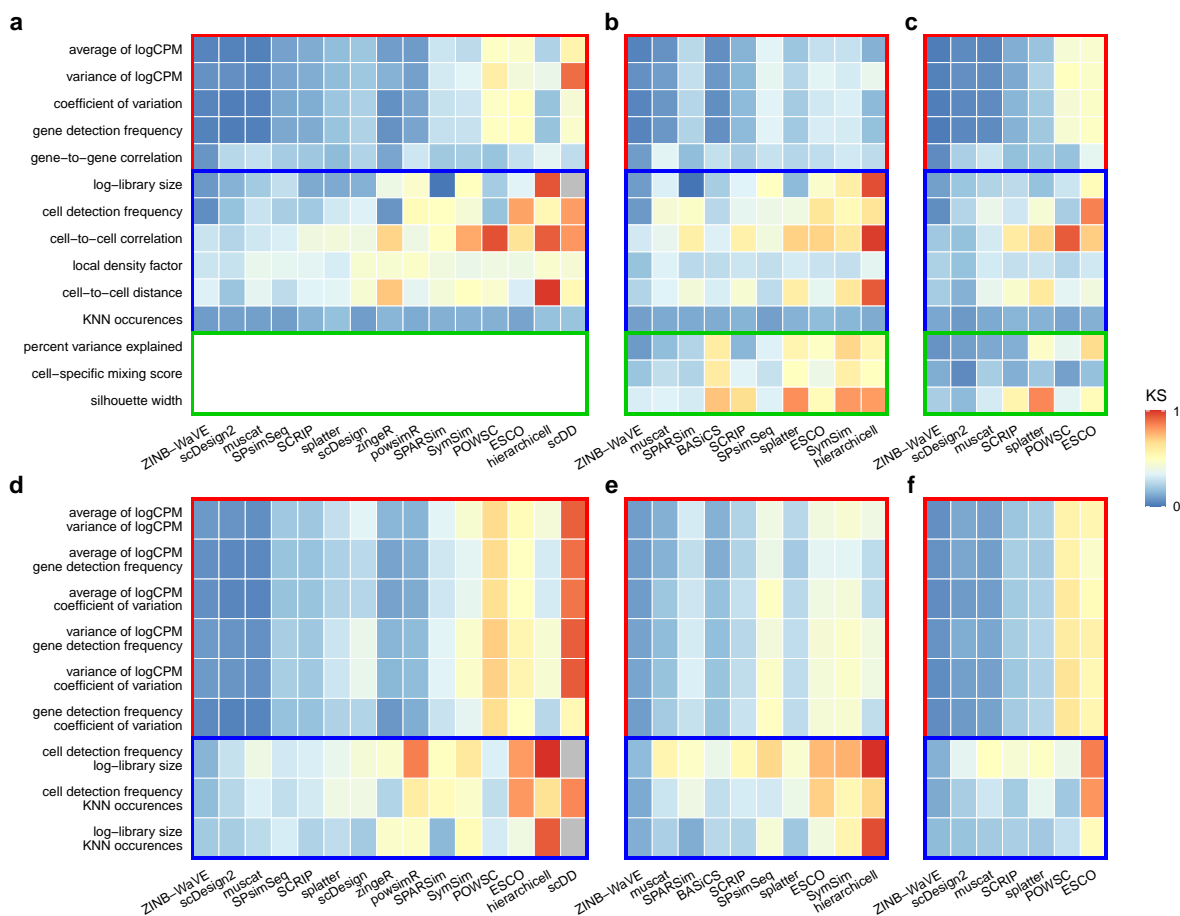

**Figure 3:** Average performance in one- (upper row) and two-dimensional evaluations (bottom row) for (a,d) type  $n$ , (b,e) type  $b$ , and (c,f) type  $k$  simulations. For each type, methods (x-axis) are ordered according to their average performance across summaries in one-dimensional comparisons. Except for type  $n$ , batch- and cluster-level results are averaged across batches and clusters, respectively. Boxes highlight gene-level (red), cell-level (blue), and global summaries (green).

To measure the scalability of methods, we repeatedly timed estimation and simulation steps across varying numbers of genes and cells (see [Methods](#)). Runtimes varied across several orders of magnitude ([Supp. Fig. 11](#)). Some methods did not offer separate estimation and data generation steps, while others can generate multiple simulations from one-time parameter estimates. Specifically, the estimation step of scDesign2, splatter, ZINB-WaVE and zingeR was relatively slow, but data simulation was not. In contrast, scDD, SPsimSeq and SymSim took longer for simulation than estimation. Overall, BASiCS was by far the slowest. scDD, scDesign2, SPsimSeq, SymSim, ZINB-WaVE, and zingeR were approximately ten fold faster. The remaining methods (ESCO, hierarchicalcell, muscat, POWSC, and splatter) were the fastest. While some methods provide arguments for parallelization (see [Tab. 1](#)), all methods were run on a single core for comparability.

**Batch simulators yield over-optimistic but faithful integration method performance.** Ideally, benchmark results (i.e. the ranking of computational tools for a given task) should be the same for experimental and simulated data. In order to investigate how method comparison results are affected by simulation,

we used the 8 type  $b$  references to compare 6 scRNA-seq batch correction methods. To evaluate method  
145 performances, we computed: i) cell-specific mixing scores (CMS); and, ii) difference in local density factors  
( $\Delta$ LDF) before and after integration<sup>[48]</sup>. In order to make metrics comparable across datasets, we zero-  
centered CMS (denoted CMS\*), and zero-centered and range-one scaled  $\Delta$ LDF (denoted  $\Delta$ LDF\*). Finally,  
we computed a batch correction score  $BCS = |CMS^*| + |\Delta LDF^*|$ , where small values indicates ideal mix-  
ing (CMS\* of 0 on average) while retaining the data's internal structure ( $\Delta$ LDF\* centered at 0), and large  
150 values indicates batch-specific bias (high CMS\* density at  $\pm 1$ ) and changes in overall structure ( $\Delta$ LDF\*  
non-symmetric).

$\Delta$ LDF\* were largely consistent between references and simulations (Supp. Fig. 13), whereas CMS\* were  
much less correlated for most methods (Supp. Fig. 12). BCSs were overall similar for simulated compared to  
reference data, and well correlated between most reference-simulation and simulation-simulation pairs (Supp.  
155 Fig. 12). Simulations from SPsimSeq, ZINB-WaVE, SPARsim, and SCRIP gave results most similar to real  
data, followed by BASiCS and splatter, and lastly muscat and SymSim. Notably, Harmony and ComBat  
failed to correct for batch-effects in splatter simulations (see also Supp. Fig. 14-21). This is presumably due  
to the fact that splatter generates batches independently, i.e., separately simulated subsets are concatenated  
into a multi-batch dataset.

160 **Cluster simulators affect the performance of clustering methods.** Secondly, we used the 8 type  $k$   
references to evaluate 9 scRNA-seq clustering methods that were previously compared in Duò *et al.*<sup>[19]</sup>. To  
evaluate method performances, we computed cluster-level F1 scores, after using the Hungarian algorithm<sup>[49]</sup>  
to match cluster assignments to 'true' labels.

Across all methods and datasets, F1 scores were consistently higher for simulated compared to real data  
165 (Fig. 4a-b). In addition, for similarly performant simulators, clustering methods rankings were more depen-  
dent on the underlying reference dataset than the specific simulator used (Fig. 4c). And, some simulators  
(e.g., splatter) gave almost identical F1 scores and rankings independent of the reference. Overall, method  
rankings (according to F1 scores) were lowly correlated between simulated and reference data, as well as  
between simulations (Fig. 4d), with scDesign2 and scDesign giving the most and least similar ranking,  
170 respectively.

Taken together, these results suggest that simulations do not achieve the same level of complexity in terms  
of intra- and inter-subpopulation effects (i.e., batches and clusters). Consequently, methods to correct of such  
effects (integration) or group together similar cells (clustering) perform over-optimistically in simulated data  
compared to more complex and noisy experimental data, and are almost indistinguishable in their performance  
175 for 'simple' datasets.





global summaries. However, the number (and nature) of summaries to comprehensively cover the inherent data structure is dependent on its complexity (e.g., global summaries are void for type  $n$ , but all the more relevant for type  $b$  and  $k$ ); and there may exist other informative summaries not considered here.

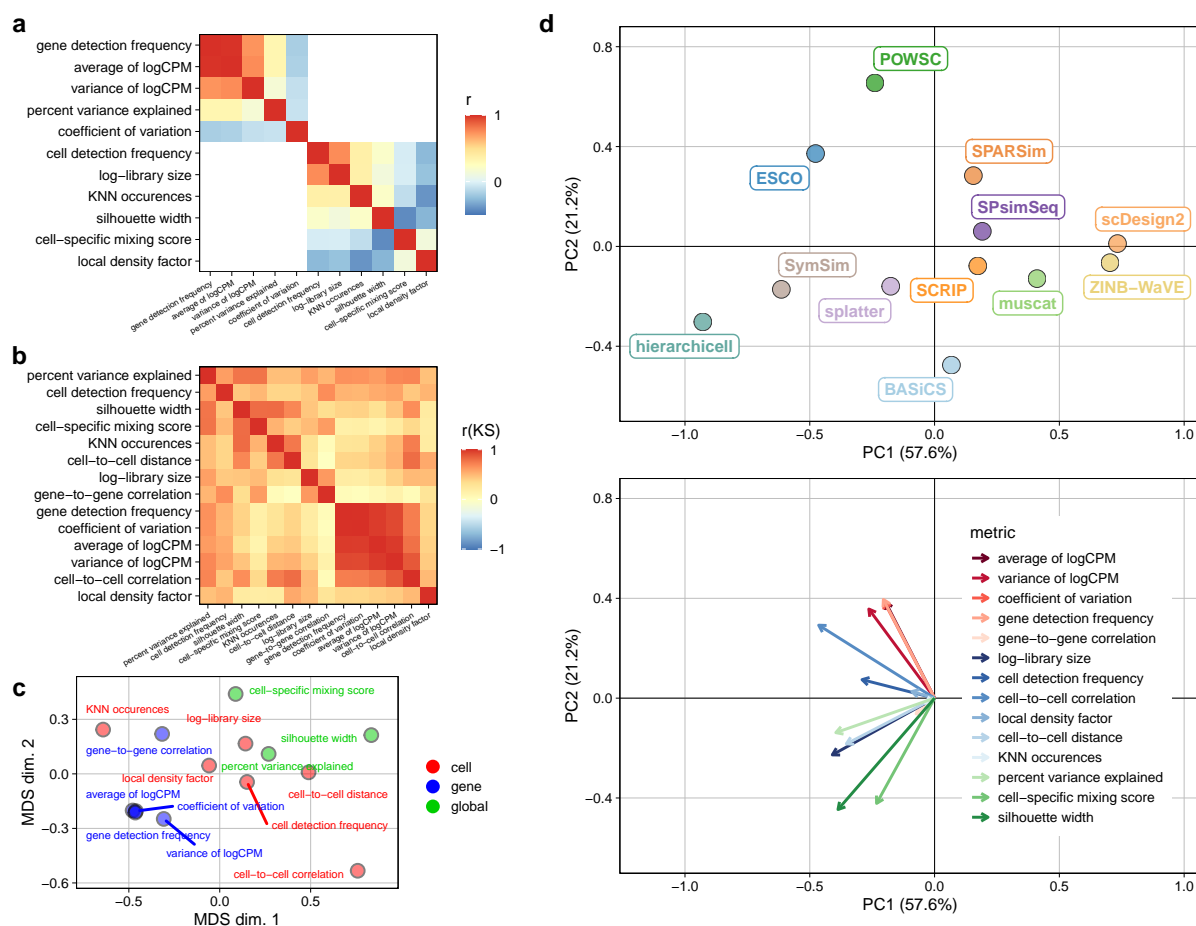

**Figure 5:** Comparison of quality control summaries and KS statistics across datasets and methods. Spearman rank correlations ( $r$ ) of (a) gene- and cell-level summaries across reference datasets, and (b) KS statistics across methods and datasets. (c) Multi-dimensional scaling (MDS) plot, and (d) principal component (PC) analysis of KS statistics across all and type  $b/k$  methods, respectively, averaged across datasets.

## 200 Discussion

In this study, we compared scRNA-seq data simulators in their ability to generate synthetic data that can recapitulate key characteristics of real reference datasets. We considered a range of gene- and cell-level summaries, as well as ones specific to capturing local and global group-effects (i.e. intra- and inter-variability of batches and clusters). By comparing the distribution of summaries as well as pairs thereof between reference and simulated data, we evaluated how well simulations capture the structure exhibited by a given reference dataset. We ranked methods by averaging their performance across summaries and simulations, thus evaluating each method across a multifaceted range of criteria (covering gene-, cell- and group-specific summaries) and datasets (from various tissues and technologies). Finally, we investigated whether the choice of simulator affects method comparison results.

210 Overall, simulations have proven paramount for the development of computational tools for the analysis

of single-cell data. However, they are often implemented for a specific task, e.g., evaluating clustering, batch correction, or DE analysis methods; an ‘all-rounder’ simulator is currently lacking, and most methods are limited to simple designs. The arguably most sobering observation of this study is that, without introducing arbitrary effects that depend on user inputs (e.g., the frequency of DE genes and magnitude of changes in their expression), the vast majority of methods can simulate only one group of cells (i.e., one batch, one cluster). As a result, most current simulators are rather limited in their applicability.

Both neutral benchmark studies as well as non-neutral comparisons performed alongside newly presented methods rely on a ground truth for evaluation. Thus, future work should be focused on the development of flexible, faithful simulation frameworks to fill this gap, especially in scenarios where an experimental ground truth is challenging or infeasible to establish. For example, which genes and cell subpopulations are affected by batch effects cannot be controlled, independent of whether control samples might be used to quantify these effects. Similarly, intra- and inter-cluster effects are unclear, even if cluster annotations might be obtained through cell-sorting or manual annotation by an expert. And, effects on gene expression remain unknown, despite controlled perturbation or time-series studies through which discrete labels might be given. Taken together, although some level of ground truth may be experimentally attainable, simulations remain indispensable owing to: i) their feasibility; and, ii) the information they provide (e.g., which genes and cell subpopulations are affected).

The most truthful model for real data is real data. Artificial data alterations (e.g., applying fold changes to a specified subset of gene expression means in certain subsets of cells) are unlikely to mimic biological differences. Even if founded on a thorough investigation of *realistic* changes, non-reference based simulations are difficult to evaluate, and conclusions drawn from *de novo* simulations in terms of method evaluations should be treated with caution.

While tools to evaluate the quality of simulated data exist, they are seldomly taken advantage of. For example, *scater*<sup>[50]</sup> offers a range of gene- and cell-level quality control summaries; *countsimQC*<sup>[51]</sup> can generate a comprehensive report comparing an input set of count matrices (e.g., real against synthetic data); and, many dataset summaries are easy to compute and compare manually. Having such reference-simulation comparisons in every (non-neutral) benchmark would add credibility to the results.

In addition to evaluating the faithfulness of simulated data, we investigated whether and to what extent benchmark results are affected by the simulator used. Our results suggest that method performances for integration and clustering of scRNA-seq data deviate from those obtained from real data; in addition, simulators that better mimic reference datasets do not necessarily yield more similar method comparison results. For example, *muscat* was among the highest ranked simulators in our study, but integration and clustering method ranking obtained from *muscat* simulations were rather inconsistent with those from real data. On the other hand, *SPsimSeq* ranked mediocre in terms of mimicking real datasets, but gave the most faithful integration method ranking. In the context of clustering, there was a consistent over-optimistic performance of methods, independent of the simulator used.

This discrepancy between the faithfulness of simulated data and benchmark results brings to question which set of summaries is sufficient to capture relevant data structure. Here, simulators were ranked by their average performance across summaries. However, many of these may be redundant (see below), or differ in their suitability to capture group-related structures (e.g., batch-/cluster-effects). Thus, simulators that are performant ‘overall’ are not guaranteed to be suitable for evaluating methods for a specific task (e.g., integration/clustering), where global structure should take priority over gene-/cell-specific summaries. An open question that needs to be answered is what summaries are important for a given task.

Besides the capabilities each method has to offer and its performance, i.e. how realistic its simulations are, there are other criteria we did not explore thoroughly. For example, *splatter* offers a well-documented, easy-

to-use framework that is both flexible and interpretable. While other methods might outperform splatter, they return parameters that are less applicable to benchmarking computational tools. For example, artificially introducing DE genes provides a binary ground truth (e.g., whether a gene is DE), whereas estimating and mimicking cluster effects might not (i.e., the user defines which genes are DE based on gene-wise parameters returned by the simulator).

Here, we have focused on methods that generate a single group or multiple groups of cells; in particular, we distinguished between ‘singular’ (type  $n$ ), multi-batch (type  $b$ ), and multi-cluster (type  $k$ ) datasets. However, there are various methods that are aimed at simulating data where gene expression profiles evolve along a discrete or continuous trajectory or time-course (e.g., *dynngen*<sup>[52]</sup>, PROSSTT<sup>[53]</sup>, SERGIO<sup>[54]</sup>). These have been applied in, for example, benchmarking methods for trajectory inference<sup>[12]</sup>.

The combination of scRNA-seq with CRISPR/Cas9 genome editing has enabled the joint readout of gene expression and cell lineage barcodes<sup>[55]</sup>. Salvador-Martínez *et al.*<sup>[56]</sup> have proposed a simulator for lineage barcode data that, however, does not generate gene expression data. A recent method, TedSim<sup>[57]</sup>, is capable of outputting combined readouts, and can be used to study tools for either or both data types, including more genuine investigation of trajectory inference methods.

Most of these methods employ fairly sophisticated and well-designed models for data generation, but require a complex set of inputs that is specific to each method and difficult to justify. Meanwhile, very few trajectory simulators support the estimation of simulation parameters from a reference dataset, making it challenging to evaluate them and opening the question of how faithful performance assessments based on them are. Overall, validating the faithfulness of synthetically generated trajectories in single-cell data remains challenging.

Taken together, while a set of performant methods to generate synthetic scRNA-seq data exist, current methods are: i) limited in the level of complexity they are able to accommodate; ii) often reliant – in full or in part – on inputs by the user to introduce (artificial) expression differences; iii) more or less suitable to evaluate other tools, depending on the data characteristics they can capture faithfully. Secondly, simulation-based benchmark studies are affected by the simulator used, and more performant simulators do not necessarily yield more reliable readouts of, e.g., integration and clustering methods. And thirdly, the chosen quality control summaries and their prioritization have an impact on the assessment of simulations and, consequently, the conclusions drawn from them. Thus, identifying the nature, number, and significance of summaries to faithfully capture scRNA-seq data structure warrants future work in order to improve method evaluations.

## Methods

### Reference datasets

Each reference dataset was retrieved from a publicly available source, including Bioconductor’s ExperimentHub<sup>[58]</sup>, the Gene Expression Omnibus (GEO) database, and public GitHub repositories. Raw data were formatted into objects of class `SingleCellExperiment`<sup>[59,60]</sup> and, with few exceptions, left *as is* otherwise. Datasets cover various organisms, tissue types, technologies, and levels of complexity (i.e. number of genes and cells, clusters and/or batches and/or experimental conditions). A summary of each dataset’s characteristics and source is given in [Supp. Tab. 1](#).

References underwent minimal filtering in order to remove groups (clusters, batches) with an insufficient number of cells, as well as genes and cells of low quality (e.g., low detection rate, few counts overall). Secondly, we drew various subsets from each reference to retain a reduced number of observations (genes and cells), as well as a known number of batches, clusters or neither (see [Supp. Tab. 2](#) and [Preprocessing](#)).

## Simulation methods

With few exceptions, methods were run using default parameters and, if available, following recommen-  
300 dations given by the authors in the corresponding software documentation. All packages were avail-  
able from a public GitHub repository, through CRAN, or Bioconductor<sup>[61]</sup>. A brief overview of each  
method’s model framework and support for parallelization is given in [Tab. 1](#). For the explicit argu-  
ments used for parameter estimation and data simulation, we refer to the method wrappers available at  
<https://github.com/HelenaLC/simulation-comparison>(snapshot at DOI:10.5281/zenodo.5679075).

## 305 Quality control summaries

We computed a set of five summaries at the gene-level: average and variance of logCPM, coefficient of varia-  
tion, detection frequency (i.e. proportion of non-zero counts), as well as gene-to-gene correlation of logCPM.  
Here, logCPM correspond to log1p-transformed counts per million computed with `scater`’s `calculateCPM`  
310 function<sup>[50]</sup>. We also computed six summaries at the cell-level: library size (i.e. total counts), detection fre-  
quency, cell-to-cell correlation (of logCPM), local density factors (LDF), cell-to-cell distance (in PCA space),  
and the number of times a cell occurs as a k-nearest neighbor (KNN). For datasets other than type  $n$ , each  
summary was computed for each of three cell groupings: globally (i.e. across all cells), at the batch-, and at  
the cluster-level. Three additional summaries – the percent variance explained (PVE) at the gene-, and the  
cell-specific mixing score (CMS) and silhouette width at the cell-level – were computed globally. Summaries  
315 are described in more detail in [Supp. Tab. 3](#).

## Evaluation statistics

For each reference-simulation pair of summaries, we computed the Kolmogorov-Smirnov (KS) test statistic  
using the `ks.test` function of the `stats` R package, and the Wasserstein metric using the `wasserstein_metric`  
320 function of the `waddR` R package<sup>[62]</sup>. In addition, we computed the two-dimensional KS statistic<sup>[63]</sup> and  
earth mover’s distance (EMD) between relevant pairs of summaries, i.e. between unique combinations of  
gene- and cell-level summaries, respectively, excluding global summaries (PVE, CMS and silhouette width)  
as well as gene-to-gene and cell-to-cell correlations. One- and two-dimensional evaluations are detailed under  
[Evaluation statistics](#).

## Runtime evaluation

325 To quantify simulator runtimes, we selected one reference per type, and drew five random subsets of 400-  
4,000 genes (fixing the number of cells) and 100-2,600 cells (fixing the number of genes). For each method  
and subset (eight in total), we separately measured the time required for parameter estimation and data  
simulation. For each step, we set a time limit of  $10^6$  seconds after which computations were interrupted.

## Integration evaluation

330 Integration methods were implemented as in Chazarra-Gil *et al.*<sup>[64]</sup> (see [Integration](#)). To evaluate method  
performances, cell-specific mixing scores (CMS) and the difference in local density factors ( $\Delta$ LDF) were  
computed using the `cms` and `ldfDiff` function, respectively, of the `CellMixS` package<sup>[48]</sup>. To make metrics  
more interpretable and comparable across datasets, we i) subtracted 0.5 to center CMS at 0 (denoted CMS\*);  
and, ii) centered (at 0) and scaled (to range 1)  $\Delta$ LDF (denoted  $\Delta$ LDF\*). Overall integration scores correspond  
335 to the unweighted average of CMS\* and  $\Delta$ LDF\*. Thus, for all three metrics, a value of 0 indicates ‘good’

mixing for a given cell. When aggregating results (e.g., for heatmap visualizations), metrics were first averaged across cells within each batch and, secondly, across batches.

## Clustering evaluation

Clustering methods were implemented as in Duò *et al.*<sup>[19]</sup> (see [Clustering](#)). If applicable, the number of  
340 clusters was set to match the number of true (annotated respective simulated) clusters. To evaluate the performance of each method, we matched true and predicted cluster labels using the Hungarian algorithm, and computed cluster-level precision, recall, and F1 score (the harmonic mean of precision and recall).

## Data availability

All reference scRNA-seq datasets are available through Bioconductor's ExperimentHub<sup>[58]</sup>, the Gene Expression Omnibus (GEO) database, or public GitHub repositories; see [Supp. Tab. 1](#) for dataset-specific sources.  
345 R objects (*.rds* files) to reproduce key results of this study are available at DOI:10.5281/zenodo.5678872. These include global, gene- and cell-level quality control summaries of reference and simulated data for different cell groupings, one- and two-dimensional test statistics across all datasets and methods, clustering and integration results for reference and simulated data, and runtimes for 5 replicates per gene- and cell-subsets  
350 for one dataset per type; see [Supplementary data](#) for a comprehensive description.

## Code availability

All analyses were run in R v4.1.0<sup>[65]</sup>, with Bioconductor v3.13<sup>[61]</sup>. The computational workflow was implemented using Snakemake v5.5.0<sup>[66]</sup>, with Python v3.6.8. Package versions used throughout this study are captured in the *session\_info.txt* file at DOI:10.5281/zenodo.5678872. All code to reproduce the  
355 results presented herein is accessible at <https://github.com/HelenaLC/simulation-comparison> (snapshot at DOI:10.5281/zenodo.5679075).

## Author contributions

HLC implemented method comparisons with significant contributions from SM. CS assisted in several conceptual aspects of the benchmark. HLC, SM and MDR drafted the manuscript with feedback from CS. All  
360 authors read and approved the final paper.

## Acknowledgements

The authors thank members of the Robinson Lab at the University of Zurich for valuable feedback on methodology, benchmarking, and exposition. This work was supported by the Swiss National Science Foundation (grant Nos. 310030\_175841 and CRSII5\_177208) and the Chan Zuckerberg Initiative DAF, an advised fund  
365 of Silicon Valley Community Foundation (grant No. 2018-182828). MDR acknowledges support from the University Research Priority Program Evolution in Action at the University of Zurich.

## References

1. Tang, F. *et al.* mRNA-Seq whole-transcriptome analysis of a single cell. *Nature Methods* **6**, 377–382 (2009).
2. Svensson, V., da Veiga Beltrame, E. & Pachter, L. A curated database reveals trends in single-cell transcriptomics. *Database* **2020** (2020).
3. Zappia, L., Phipson, B. & Oshlack, A. Exploring the single-cell RNA-seq analysis landscape with the scRNA-tools database. *PLoS Computational Biology* **14**, e1006245 (2018).
4. Zappia, L. & Theis, F. J. Over 1000 tools reveal trends in the single-cell RNA-seq analysis landscape. *bioRxiv*, 2021.08.13.456196 (2021).
5. Mangul, S. *et al.* Systematic benchmarking of omics computational tools. *Nature Communications* **10**, 1393 (2019).
6. Weber, L. M. *et al.* Essential guidelines for computational method benchmarking. *Genome Biology* **20**, 125 (2019).
7. Buchka, S., Hapfelmeier, A., Gardner, P. P., Wilson, R. & Boulesteix, A.-L. On the optimistic performance evaluation of newly introduced bioinformatic methods. *Genome Biology* **22** (2021).
8. Boulesteix, A.-L. *et al.* Introduction to statistical simulations in health research. *BMJ Open* **10**, e039921 (2020).
9. Dal Molin, A., Baruzzo, G. & Di Camillo, B. Single-Cell RNA-Sequencing: Assessment of Differential Expression Analysis Methods. *Frontiers in Genetics* **8**, 62 (2017).
10. Soneson, C. & Robinson, M. D. Bias, robustness and scalability in single-cell differential expression analysis. *Nature Methods* **15**, 255–261 (2018).
11. Wang, T., Li, B., Nelson, C. E. & Nabavi, S. Comparative analysis of differential gene expression analysis tools for single-cell RNA sequencing data. *BMC Bioinformatics* **20**, 40 (2019).
12. Saelens, W., Cannoodt, R., Todorov, H. & Saeys, Y. A comparison of single-cell trajectory inference methods. *Nature Biotechnology* **37**, 547–554 (2019).
13. Luecken, M. D. *et al.* Benchmarking atlas-level data integration in single-cell genomics. *bioRxiv*, 2020.05.22.111161 (2020).
14. Tran, H. T. N. *et al.* A benchmark of batch-effect correction methods for single-cell RNA sequencing data. *Genome Biology* **21**, 12 (2020).
15. Zappia, L., Phipson, B. & Oshlack, A. Splatter: simulation of single-cell RNA sequencing data. *Genome Biology* **18**, 174 (2017).
16. Assefa, A. T., Vandesompele, J. & Thas, O. SPsimSeq: semi-parametric simulation of bulk and single cell RNA sequencing data. *Bioinformatics* (2020).
17. Cao, Y., Yang, P. & Yang, J. Y. H. A benchmark study of simulation methods for single-cell RNA sequencing data. *bioRxiv*, 2021.06.01.446157 (June 2021).
18. Krzak, M., Raykov, Y., Boukouvalas, A., Cutillo, L. & Angelini, C. Benchmark and Parameter Sensitivity Analysis of Single-Cell RNA Sequencing Clustering Methods. *Frontiers in Genetics* **10**, 1253 (2019).
19. Duò, A., Robinson, M. D. & Soneson, C. A systematic performance evaluation of clustering methods for single-cell RNA-seq data. *F1000Research* **7**, 1141 (2020).
20. Li, R., Guan, J. & Zhou, S. Single-cell RNA-seq data clustering: A survey with performance comparison study. *Journal of Bioinformatics and Computational Biology* **18**, 2040005 (2020).
21. Xi, N. M. & Li, J. J. Benchmarking Computational Doublet-Detection Methods for Single-Cell RNA Sequencing Data. *Cell Systems* **12**, 176–194.e6 (2021).
22. Chen, W. *et al.* A comparison of methods accounting for batch effects in differential expression analysis of UMI count based single cell RNA sequencing. *Computational and Structural Biotechnology Journal* **18**, 861–873 (2020).
23. Sun, S., Zhu, J., Ma, Y. & Zhou, X. Accuracy, robustness and scalability of dimensionality reduction methods for single-cell RNA-seq analysis. *Genome Biology* **20**, 269 (2019).
24. Heiser, C. N. & Lau, K. S. A Quantitative Framework for Evaluating Single-Cell Data Structure Preservation by Dimensionality Reduction Techniques. *Cell Reports* **31**, 107576 (2020).
25. Andrews, T. S. & Hemberg, M. False signals induced by single-cell imputation. *F1000Research* **7**, 1740 (2018).
26. Zhang, L. & Zhang, S. Comparison of Computational Methods for Imputing Single-Cell RNA-Sequencing Data. *IEEE/ACM Transactions on Computational Biology and Bioinformatics* **17**, 376–389 (2020).
27. Westoby, J., Herrera, M. S., Ferguson-Smith, A. C. & Hemberg, M. Simulation-based benchmarking of isoform quantification in single-cell RNA-seq. *Genome Biology* **19**, 191 (2018).
28. Gilbert, A. C. & Vargo, A. Comparison of marker selection methods for high throughput scRNA-seq data. *bioRxiv*, 679761 (2019).
29. Yip, S. H., Sham, P. C. & Wang, J. Evaluation of tools for highly variable gene discovery from single-cell RNA-seq data. *Briefings in Bioinformatics* **20**, 1583–1589 (2019).
30. Cole, M. B. *et al.* Performance Assessment and Selection of Normalization Procedures for Single-Cell RNA-Seq. *Cell Systems* **8**, 315–328.e8 (2019).
31. Vieth, B., Parekh, S., Ziegenhain, C., Enard, W. & Hellmann, I. A systematic evaluation of single cell RNA-seq analysis pipelines. *Nature Communications* **10**, 4667 (2019).

32. Germain, P.-L., Sonrel, A. & Robinson, M. D. pipeComp, a general framework for the evaluation of computational pipelines, reveals performant single cell RNA-seq preprocessing tools. *Genome Biology* **21**, 227 (2020).
33. Huang, Q., Liu, Y., Du, Y. & Garmire, L. X. Evaluation of Cell Type Annotation R Packages on Single-cell RNA-seq Data. *Genomics, Proteomics & Bioinformatics* (2020).
34. Vallejos, C. A., Marioni, J. C. & Richardson, S. BASiCS: Bayesian Analysis of Single-Cell Sequencing Data. *PLoS Computational Biology* **11**, e1004333 (2015).
35. Tian, J., Wang, J. & Roeder, K. ESCO: single cell expression simulation incorporating gene co-expression. *bioRxiv*, 2020.10.20.347211 (2020).
36. Zimmerman, K. D. & Langefeld, C. D. Hierarchicell: an R-package for estimating power for tests of differential expression with single-cell data. *BMC Genomics* **22**, 1–8 (2021).
37. Crowell, H. L. *et al.* muscat detects subpopulation-specific state transitions from multi-sample multi-condition single-cell transcriptomics data. *Nature Communications* **11**, 6077 (2020).
38. Su, K., Wu, Z. & Wu, H. Simulation, power evaluation and sample size recommendation for single-cell RNA-seq. *Bioinformatics* **36**, 4860–4868 (2020).
39. Vieth, B., Ziegenhain, C., Parekh, S., Enard, W. & Hellmann, I. powsimR: power analysis for bulk and single cell RNA-seq experiments. *Bioinformatics* **33**, 3486–3488 (2017).
40. Korthauer, K. D. *et al.* A statistical approach for identifying differential distributions in single-cell RNA-seq experiments. *Genome Biology* **17**, 222 (2016).
41. Li, W. V. & Li, J. J. A statistical simulator scDesign for rational scRNA-seq experimental design. *Bioinformatics* **35**, i41–i50 (2019).
42. Sun, T., Song, D., Li, W. V. & Li, J. J. scDesign2: an interpretable simulator that generates high-fidelity single-cell gene expression count data with gene correlations captured. *bioRxiv*, 2020.11.17.387795 (2020).
43. Baruzzo, G., Patuzzi, I. & Di Camillo, B. SPARSim single cell: a count data simulator for scRNA-seq data. *Bioinformatics* **36**, 1468–1475 (2020).
44. Zhang, X., Xu, C. & Yosef, N. Simulating multiple faceted variability in single cell RNA sequencing. *Nature Communications* **10**, 2611 (2019).
45. Risso, D., Perraudeau, F., Gribkova, S., Dudoit, S. & Vert, J.-P. A general and flexible method for signal extraction from single-cell RNA-seq data. *Nature Communications* **9**, 284 (2018).
46. Van den Berge, K., Sonesson, C., Love, M. I., Robinson, M. D. & Clement, L. zingeR: unlocking RNA-seq tools for zero-inflation and single cell applications. *bioRxiv*, 157982 (2017).
47. Massey, F. J. The Kolmogorov-Smirnov Test for Goodness of Fit. *Journal of the American Statistical Association* **46**, 68–78 (1951).
48. Lütge, A. *et al.* CellMixS: quantifying and visualizing batch effects in single-cell RNA-seq data. *Life Science Alliance* **4** (2021).
49. Kuhn, H. W. The Hungarian method for the assignment problem. *Naval Research Logistics* **52**, 7–21 (2005).
50. McCarthy, D. J., Campbell, K. R., Lun, A. T. L. & Wills, Q. F. Scater: pre-processing, quality control, normalization and visualization of single-cell RNA-seq data in R. *Bioinformatics* **33**, 1179–1186 (2017).
51. Sonesson, C. & Robinson, M. D. Towards unified quality verification of synthetic count data with countsimQC. *Bioinformatics* **34**, 691–692 (2018).
52. Cannoodt, R., Saelens, W., Deconinck, L. & Saeys, Y. Spearheading future omics analyses using dyngen, a multi-modal simulator of single cells. *Nature Communications* **12**, 3942 (2021).
53. Papadopoulos, N., Gonzalo, P. R. & Söding, J. PROSSTT: probabilistic simulation of single-cell RNA-seq data for complex differentiation processes. *Bioinformatics* **35**, 3517–3519 (2019).
54. Dibaeinia, P. & Sinha, S. SERGIO: A Single-Cell Expression Simulator Guided by Gene Regulatory Networks. *Cell Systems* **11**, 252–271.e11 (2020).
55. Raj, B. *et al.* Simultaneous single-cell profiling of lineages and cell types in the vertebrate brain. *Nature Biotechnology* **36**, 442–450 (2018).
56. Salvador-Martínez, I., Grillo, M., Averof, M. & Telford, M. J. Is it possible to reconstruct an accurate cell lineage using CRISPR recorders? *elife* **8** (2019).
57. Pan, X., Li, H. & Zhang, X. TedSim: temporal dynamics simulation of single cell RNA-sequencing data and cell division history. *bioRxiv* (2021).
58. Morgan, M. & Shepherd, L. ExperimentHub: Client to access ExperimentHub resources. *R package version 2.0.0* (2021).
59. Lun, A., Risso, D. & Korthauer, K. SingleCellExperiment: S4 classes for single cell data. *R package version 1.14.1* (2021).
60. Amezquita, R. A. *et al.* Orchestrating single-cell analysis with Bioconductor. *Nature Methods* (2019).
61. Huber, W. *et al.* Orchestrating high-throughput genomic analysis with Bioconductor. *Nature Methods* **12**, 115–121 (2015).
62. Schefzik, R., Flesch, J. & Goncalves, A. Fast identification of differential distributions in single-cell RNA-sequencing data with waddR. *Bioinformatics* (2021).
63. Peacock, J. A. Two-dimensional goodness-of-fit testing in astronomy. *Monthly Notices of the Royal Astronomical Society* (1983).



64. Chazarra-Gil, R., van Dongen, S., Kiselev, V. Y. & Hemberg, M. Flexible comparison of batch correction methods for single-cell RNA-seq using BatchBench. *Nucleic Acids Research* **49**, e42 (2021).
65. R Core Team. *R: A Language and Environment for Statistical Computing* (R Foundation for Statistical Computing, Vienna, Austria, 2019).
66. Köster, J. & Rahmann, S. Snakemake – a scalable bioinformatics workflow engine. *Bioinformatics* **28**, 2520–2522 (2012).
